# Supplementary material
Source: PubMed Central journal article supplement (PMC5817888)
Supplement: NIHMS941328-supplement-Supplemental.pdf [file NIHMS941328-supplement-Supplemental.pdf]

**Supporting Information for:**

**Experimental evolution of diverse strains as a method for the determination of biochemical mechanisms of action for novel pyrrolizidinone antibiotics**

Kathryn Beabout<sup>†1</sup>, Megan D. McCurry<sup>†1</sup>, Heer Mehta<sup>†</sup>, Akshay A. Shah<sup>‡</sup>, Kiran K. Pulukuri<sup>‡</sup>,  
Stephan Rigol<sup>‡</sup>, Yanping Wang<sup>‡</sup>, K. C. Nicolaou<sup>‡</sup>, Yousif Shamoo<sup>\*†</sup>

<sup>1</sup>These authors contributed equally to this work.

<sup>†</sup>Department of BioSciences, Rice University, 6100 Main Street, Houston, Texas, 77005, United States

<sup>‡</sup>Department of Chemistry, BioScience Research Collaborative, Rice University, 6100 Main Street, Houston, Texas, 77005, United States

\*Corresponding author. E-mail: shamoo@rice.edu

**Table of Contents**

**Figure S1:** Killing curves for pyrrolizidinone natural product (CJ-16,264) and analog (KCN-AAS-35) against *S. aureus* MRSA131 demonstrate bacteriostatic mechanism of action (**pg S2**).

**Figure S2:** The growth of *B. subtilis* D11-1 and G11-2 was not cysteine-dependent, despite the presence of mutations in cysteine synthetase (**pg S3**).

**Table S1:** Mutations Identified in KCN-AAS-35 adapted clones (**pgs S4-S9**).

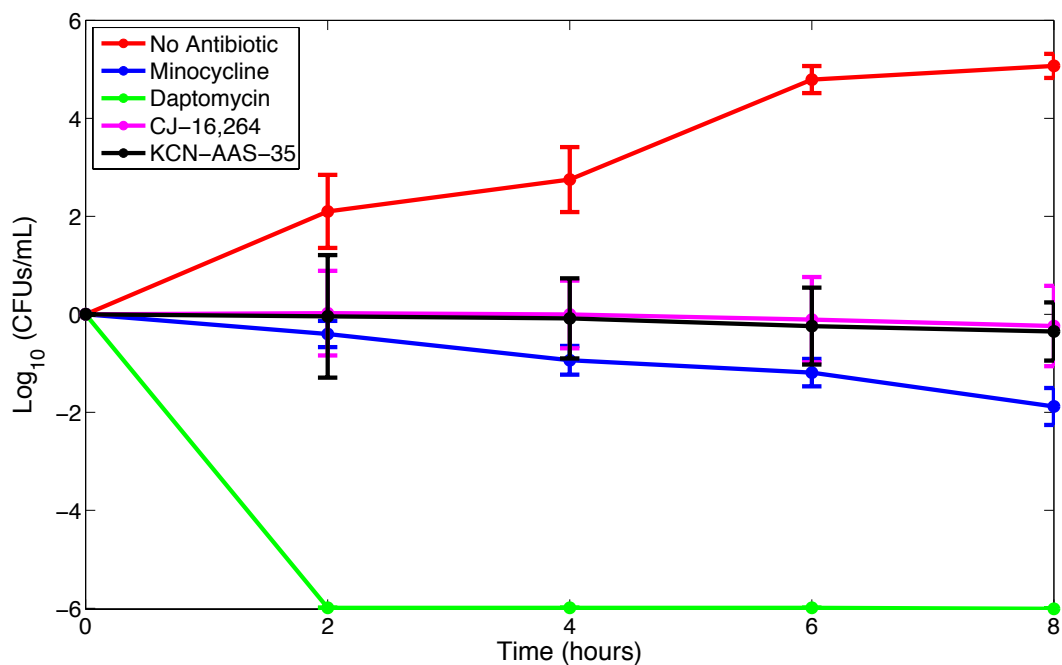

**Figure S1. Killing curves for pyrrolizidinone natural product (CJ-16,264) and analog (KCN-AAS-35) against *S. aureus* MRSA131 demonstrate bacteriostatic mechanism of action.** We performed time-kill assays using *S. aureus* MRSA131 cultures. Cells were treated with five times the MIC of different antibiotics and the CFUs were determined at 0, 2, 4, 6 and 8 hours after the addition of antibiotic. The assay was setup in triplicate with error bars displaying the standard deviation. Three controls were included, a growth control with no antibiotic (red), a bacteriostatic agent (minocycline, blue), and a bactericidal agent (daptomycin, green). When grown in the presence of KCN-AAS-1 (pink) or the analog KCN-AAS-35 (black) bacteriostatic activity was observed.

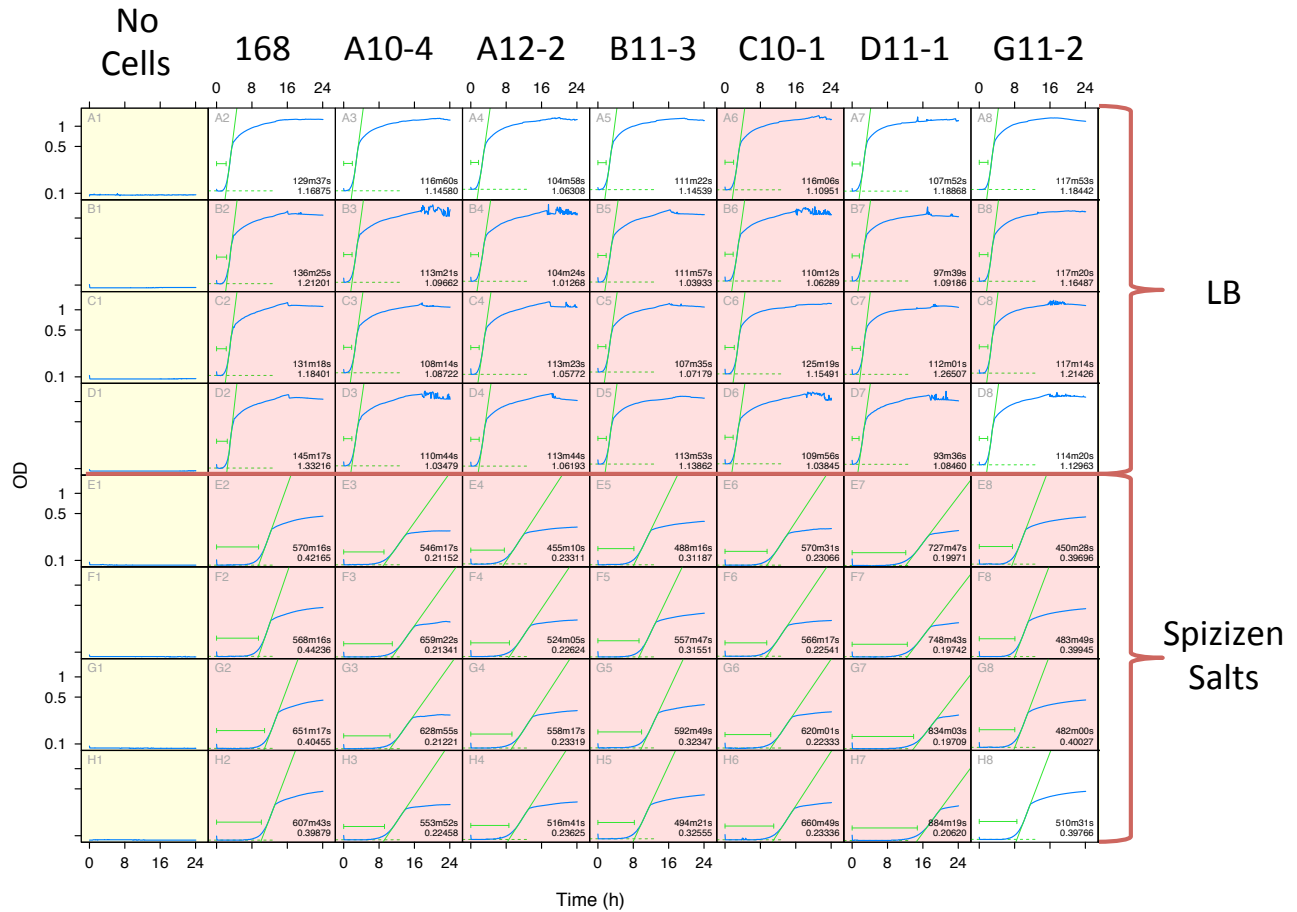

**Figure S2: The growth of *B. subtilis* D11-1 and G11-2 was not cysteine-dependent, despite the presence of mutations in cysteine synthetase.** The adapted *B. subtilis* D11-1 and G11-2 strains, which harbor mutations in the *cysK* cysteine synthetase gene (Table 2), grew in Spizzen salts minimal media despite the absence of cysteine, demonstrating that the strains are still capable of producing cysteine. *B. subtilis* 168 and the KCN-AAS-35 adapted strains were each cultured overnight in LB media or Spizzen media. The overnight cultures were then diluted 1:100 into the same media and 150  $\mu$ l of diluted cells was placed into each well of a 96 well plate. The plates were kept at 37°C on a Synergy 2 (BioTek) Gen5 plate reader for 24 hrs and the optical density (OD) at 600 nm was measured every 5 min. The first column is a no growth control with media-lacking cells and the subsequent columns each contain a different strain. The top four rows have wells with four replicates of each strain in LB media, while the bottom four rows have wells with four replicates of each strain in Spizzen salts.

**Table S1: Mutations Identified in KCN-AAS-35 adapted clones.**

| <i>B. subtilis</i> 168   |                      |          |                                                             |                                                                                            |
|--------------------------|----------------------|----------|-------------------------------------------------------------|--------------------------------------------------------------------------------------------|
| Clone                    | Chromosomal Position |          | Mutation                                                    | Description                                                                                |
| A10-4                    | 490,597              |          | ΔT, Intergenic (+43/+180) (T)17→16                          | Thiamine pyrophosphate-containing protein YdaP/Hypothetical protein                        |
|                          | 660,862              |          | +A, Frame shift: coding(267/1032 nt) (A)6→7                 | Type-2 restriction enzyme BsuMI component, YdiS                                            |
|                          | 2,812,132            |          | Δ32 bp (Deletes ribosome binding site & start codon)        | Rrf2 family transcriptional regulator, CymR                                                |
| A12-3                    | 1,232,374            |          | S431L (TCA→TTA)                                             | Oligoendopeptidase F                                                                       |
|                          | 2,812,054            |          | S27L (TCA→TTA)                                              | Rrf2 family transcriptional regulator, CymR                                                |
| B11-3                    | 427,389              |          | Y48C (TAT→TGT)                                              | Sensor histidine kinase                                                                    |
|                          | 490,597              |          | ΔT, Intergenic (+43/+180) (T)17→16                          | Thiamine pyrophosphate-containing protein YdaP/hypothetical protein                        |
|                          | 659,999              |          | ΔT, Frame shift: coding(377/942 nt) (T)7→6                  | Type-2 restriction enzyme BsuMI component, YdiR                                            |
|                          | 2,812,005            |          | E43D (GAG→GAT)                                              | Rrf2 family transcriptional regulator, CymR                                                |
| C10-1                    | 660,281              |          | W220* (TGG→TAG)                                             | Type-2 restriction enzyme BsuMI component, YdiR                                            |
|                          | 2,812,021            |          | S38F (TCC→TTC)                                              | Rrf2 family transcriptional regulator, CymR                                                |
| D11-1                    | 82,425               |          | ΔC, Frame shift: coding(655/927 nt) (C)5→4                  | Cysteine synthase, CysK                                                                    |
|                          | 657,210              |          | Δ8,753 bp                                                   | Methylase, YdiR                                                                            |
| G11-2                    | 81,909               |          | R47C (CGT→TGT)                                              | Cysteine synthase, CysK                                                                    |
|                          | 659,575              |          | A→G, Intergenic (+1878/-48)                                 | BsuMI modification methylase subunit, YdiP/Type-2 restriction enzyme BsuMI component, YdiR |
| <i>S. aureus</i> MRSA131 |                      |          |                                                             |                                                                                            |
| Clone                    | Contig               | Position | Mutation                                                    | Description                                                                                |
| B11-3                    | GL638171             | 68,446   | V567V (GTG→GTT)                                             | ABC transporter, ATP-binding protein                                                       |
|                          | GL638175             | 100,508  | Δ25, Intergenic (-169/+68) (GTTAATATTGCGTATAATTT TCAAA) 2→3 | RIP metalloprotease RseP/phosphatidate cytidyltransferase                                  |
|                          | GL638175             | 282,915  | +T, Frame shift: coding(279/663 nt) (T)7→8                  | TrkA N-terminal domain protein                                                             |
|                          | GL638177             | 1        | Δ1,166 bp                                                   | Deletion of entire contig (Deletion of Replication initiation protein)                     |
|                          | GL638181             | 69,198   | +G, Frame shift: coding(66/423 nt)                          | Transcriptional regulator, Rrf2 family, CymR                                               |
|                          | GL638181             | 69,199   | Q23K (CAA→AAA)                                              | Transcriptional regulator, Rrf2 family, CymR                                               |
|                          | GL638182             | 92,282   | S68A (TCA→GCA)                                              | Transposase                                                                                |
|                          | GL638182             | 92,287   | S66L (TCA→TTA)                                              | Transposase                                                                                |
|                          | GL638182             | 92,311   | L58P (CTA→CCA)                                              | Transposase                                                                                |

|       |          |         |                                                             |                                                                                                                                                                                                                                |
|-------|----------|---------|-------------------------------------------------------------|--------------------------------------------------------------------------------------------------------------------------------------------------------------------------------------------------------------------------------|
|       | GL638182 | 113,164 | A13P (GCA→CCA)                                              | HTH-type transcriptional regulator, SarR                                                                                                                                                                                       |
|       | GL638185 | 1       | Δ594 bp                                                     | Deletion of entire contig                                                                                                                                                                                                      |
|       | GL638192 | 1       | Δ926 bp                                                     | Deletion of entire contig (Deletion of Hypothetical membrane protein)                                                                                                                                                          |
|       | GL638198 | 86,041  | L379P (CTT→CCT)                                             | Putative Na <sup>+</sup> /H <sup>+</sup> antiporter                                                                                                                                                                            |
| C11-2 | GL638168 | 24,639  | +A, Frame shift: coding(234/312 nt)(A)6→7                   | Ribosomal protein L7Ae                                                                                                                                                                                                         |
|       | GL638171 | 43,620  | A→G, Intergenic (+1332/+142)                                | Serine-rich adhesin for platelets/Flavin reductase                                                                                                                                                                             |
|       | GL638181 | 69,192  | ΔA, Frame shift: coding(60/423 nt) (A)6→5                   | Transcriptional regulator, Rrf2 family, CymR                                                                                                                                                                                   |
|       | GL638188 | 9,748   | Y397Y (TAT→TAC)                                             | Transposase, IS4 family                                                                                                                                                                                                        |
|       | GL638196 | 25,144  | Y71N (TAT→AAT)                                              | Pur operon repressor PurR                                                                                                                                                                                                      |
|       | GL638198 | 88,914  | ΔT, Frame shift: coding(40/1830 nt) (T)8→7                  | Amino acid permease                                                                                                                                                                                                            |
|       | GL638198 | 101,619 | A→G, Intergenic (+221/-387)                                 | Amino acid permease family protein/Carboxylesterase                                                                                                                                                                            |
| E10-1 | GL638164 | 32,633  | N421K (AAT→AAG)                                             | EVE-domain containing protein                                                                                                                                                                                                  |
|       | GL638166 | 3,187   | P34L (CCA→CTA)                                              | Hypothetical protein                                                                                                                                                                                                           |
|       | GL638171 | 55,306  | +56 bp, Intergenic (+244/+147)                              | Hypothetical protein/Triacylglycerol lipase                                                                                                                                                                                    |
|       | GL638175 | 100,508 | Δ25, Intergenic (-169/+68) (GTTAATATTGCGTATAATTT TCAAA) 2→3 | RIP metalloprotease RseP/phosphatidate cytidyltransferase                                                                                                                                                                      |
|       | GL638175 | 283,123 | L24* (TTA→TGA)                                              | TrkA N-terminal domain protein                                                                                                                                                                                                 |
|       | GL638181 | 26,612  | +6 bp, Frame shift: coding(62/1263 nt) (CCAAGA)1→2          | ATP-dependent Clp protease, ATP-binding subunit, ClpX                                                                                                                                                                          |
|       | GL638181 | 66,703  | Δ3,901 bp                                                   | Deletion of Hypothetical protein; ThIF family protein; Recombination factor protein, RarA; Transcriptional regulator, Rrf2 (CymR); CsbD-like protein; Hypothetical protein; and FMN-dependent luciferase family oxidoreductase |
|       | GL638181 | 155,387 | Δ56 bp, Intergenic (+7/+2)                                  | Biotin/lipoate A/B protein ligase family protein/hypothetical protein                                                                                                                                                          |
|       | GL638182 | 92,282  | S68A (TCA→GCA)                                              | Transposase                                                                                                                                                                                                                    |
|       | GL638182 | 92,287  | S66L (TCA→TTA)                                              | Transposase                                                                                                                                                                                                                    |
|       | GL638183 | 131,080 | L42I (CTT→ATT)                                              | HTH-type transcriptional regulator, MgrA                                                                                                                                                                                       |
|       | GL638188 | 9,748   | Y397Y (TAT→TAC)                                             | Transposase, IS4 family                                                                                                                                                                                                        |
|       | GL638197 | 50,984  | Δ9 bp, In-frame, coding(454-462/1509 nt)                    | Gram-positive signal peptide protein, YSIRK family                                                                                                                                                                             |
| E10-3 | GL638164 | 32,633  | N421K (AAT→AAG)                                             | EVE-domain containing protein                                                                                                                                                                                                  |
|       | GL638175 | 100,508 | Δ25, Intergenic (-169/+68) (GTTAATATTGCGTATAATTT TCAAA) 2→3 | RIP metalloprotease RseP/phosphatidate cytidyltransferase                                                                                                                                                                      |
|       | GL638175 | 180,975 | P51P (CCA→CCC)                                              | S4 domain protein                                                                                                                                                                                                              |
|       | GL638175 | 315,526 | Q30* (CAG→TAG)                                              | Beta-lactamase                                                                                                                                                                                                                 |

|       |          |         |                                                                                   |                                                                                                                                                                                                                                                   |
|-------|----------|---------|-----------------------------------------------------------------------------------|---------------------------------------------------------------------------------------------------------------------------------------------------------------------------------------------------------------------------------------------------|
|       | GL638181 | 26,612  | +6 bp, Frame shift:<br>coding(62/1263 nt)<br>(CCAAGA) <sub>1</sub> → <sub>2</sub> | ATP-dependent Clp protease,<br>ATP-binding subunit, ClpX                                                                                                                                                                                          |
|       | GL638181 | 66,703  | Δ3,901 bp                                                                         | Deletion of Hypothetical protein; ThIF<br>family protein; Recombination factor<br>protein, RarA; Transcriptional regulator,<br>Rrf2 (CymR); CsbD-like protein;<br>Hypothetical protein; and FMN-<br>dependent luciferase family<br>oxidoreductase |
|       | GL638182 | 92,282  | S68A (TCA→GCA)                                                                    | Transposase                                                                                                                                                                                                                                       |
|       | GL638182 | 92,287  | S66L (TCA→TTA)                                                                    | Transposase                                                                                                                                                                                                                                       |
|       | GL638182 | 92,311  | L58P (CTA→CCA)                                                                    | Transposase                                                                                                                                                                                                                                       |
|       | GL638183 | 131,080 | L42I (CTT→ATT)                                                                    | HTH-type transcriptional regulator MgrA                                                                                                                                                                                                           |
| E11-1 | GL638168 | 25,323  | I1076F (ATC→TTC)                                                                  | DNA-directed RNA polymerase, beta<br>subunit                                                                                                                                                                                                      |
|       | GL638175 | 149,008 | G40V (GGT→GTT)                                                                    | Protein phosphatase 2C                                                                                                                                                                                                                            |
|       | GL638181 | 69,124  | G→A, Intergenic (-103/-9)                                                         | Recombination factor protein<br>RarA/Transcriptional regulator, Rrf2<br>family, CymR                                                                                                                                                              |
|       | GL638183 | 130,242 | Δ3,333 bp                                                                         | Deletion of CobW/P47K family protein;<br>MgrA; ABC transporter, ATP-binding<br>protein; and ABC transporter, ATP-<br>binding protein                                                                                                              |
| F10-4 | GL638164 | 17,599  | G18E (GGA→GAA)                                                                    | PTS system mannitol-specific EIICB<br>component                                                                                                                                                                                                   |
|       | GL638166 | 2,476   | ΔA, Intergenic (-371/+163)<br>(A) <sub>9</sub> → <sub>8</sub>                     | Hypothetical protein/Hypothetical protein                                                                                                                                                                                                         |
|       | GL638168 | 459     | L1004S (TTA→TCA)                                                                  | Serine-aspartate repeat-containing<br>protein D                                                                                                                                                                                                   |
|       | GL638168 | 52,696  | ΔT, Frame shift:<br>coding(130/153 nt) (T) <sub>7</sub> → <sub>6</sub>            | Hypothetical protein                                                                                                                                                                                                                              |
|       | GL638170 | 115,158 | T→C, Intergenic (-266/-90)                                                        | PTS system, glucose-like IIB<br>component/Inosine-uridine preferring<br>nucleoside hydrolase                                                                                                                                                      |
|       | GL638171 | 23,279  | V52V (GTG→GTA)                                                                    | Isochorismatase family protein                                                                                                                                                                                                                    |
|       | GL638171 | 60,209  | R156R (CGG→CGA)                                                                   | 1-(5-phosphoribosyl)-5-[(5- phosphoribos<br>ylamino)<br>methylideneamino]imidazole-4- carboxa<br>mide isomerase                                                                                                                                   |
|       | GL638171 | 62,736  | I23I (ATT→ATC)                                                                    | Aminotransferase, class I/II                                                                                                                                                                                                                      |
|       | GL638171 | 125,815 | ΔA, Frame shift:<br>coding(582/1335 nt) (A) <sub>6</sub> → <sub>5</sub>           | YycH protein                                                                                                                                                                                                                                      |
|       | GL638173 | 22,633  | ΔA, Frame shift:<br>coding(124/558 nt)                                            | Probable membrane protein                                                                                                                                                                                                                         |
|       | GL638175 | 38,190  | +T, Frame shift:<br>coding(156/174 nt) (T) <sub>6</sub> → <sub>7</sub>            | Hypothetical protein                                                                                                                                                                                                                              |
|       | GL638175 | 59,665  | +A, Frame shift:<br>coding(246/2619 nt)                                           | DNA mismatch repair protein, MutS                                                                                                                                                                                                                 |
|       | GL638175 | 100,508 | Δ25 bp, Intergenic (-169/+68)<br>(GTTAATATTGCGTATAATTT                            | RIP metalloprotease RseP/phosphatidate<br>cytidyltransferase                                                                                                                                                                                      |

|          |         |                                                          |                                                                          |
|----------|---------|----------------------------------------------------------|--------------------------------------------------------------------------|
|          |         | TCAAA)2→3                                                |                                                                          |
| GL638175 | 185,116 | H439H (CAT→CAC)                                          | Cell division protein, FtsA                                              |
| GL638175 | 350,096 | G313S (GGT→AGT)                                          | Cation transport protein                                                 |
| GL638175 | 366,380 | S19S (AGT→AGC)                                           | Enoyl-(acyl-carrier-protein) reductase                                   |
| GL638177 | 2       | A→G, Intergenic (-/-180)                                 | -/Replication protein                                                    |
| GL638181 | 26,612  | +6 bp, Frame shift:<br>coding(62/1263 nt)<br>(CCAAGA)1→2 | ATP-dependent Clp protease,<br>ATP-binding subunit, ClpX                 |
| GL638181 | 69,322  | G64R (GGA→AGA)                                           | Transcriptional regulator, Rrf2 family,<br>CymR                          |
| GL638181 | 88,853  | +A, Frame shift:<br>coding(567/1362 nt) (A)7→8           | Putative acetyl-CoA carboxylase, biotin<br>carboxylase subunit           |
| GL638181 | 303,996 | A981V (GCA→GTA)                                          | Gram-positive signal peptide protein,<br>YSIRK family                    |
| GL638181 | 305,699 | V1549M (GTG→ATG)                                         | Gram-positive signal peptide protein,<br>YSIRK family                    |
| GL638181 | 326,965 | K8637K (AAA→AAG)                                         | Gram-positive signal peptide protein,<br>YSIRK family                    |
| GL638182 | 8,643   | I250V (ATA→GTA)                                          | ABC transporter, permease protein                                        |
| GL638182 | 28,920  | +A, Frame shift:<br>coding(2449/2523 nt) (A)5→6          | Phosphatidylglycerol lysyltransferase                                    |
| GL638182 | 34,647  | +T, Frame shift:<br>coding(1357/1461 nt) (T)6→7          | Amino acid carrier protein                                               |
| GL638182 | 41,612  | G→A, Intergenic (+152/-224)                              | Acyl-phosphate glycerol 3-phosphate<br>acyltransferase/HesB-like protein |
| GL638182 | 92,282  | S68A (TCA→GCA)                                           | Transposase                                                              |
| GL638182 | 92,287  | S66L (TCA→TTA)                                           | Transposase                                                              |
| GL638182 | 92,311  | L58P (CTA→CCA)                                           | Transposase                                                              |
| GL638182 | 180,161 | T77A (ACT→GCT)                                           | Alpha-acetolactate decarboxylase                                         |
| GL638183 | 51,763  | K27E (AAA→GAA)                                           | Excinuclease ABC, A subunit                                              |
| GL638183 | 86,783  | G102G (GGT→GGC)                                          | Amino acid/peptide transporter                                           |
| GL638183 | 244,965 | T423T (ACA→ACG)                                          | Transporter, major facilitator family<br>protein                         |
| GL638186 | 16,294  | T→C, Intergenic (+581/+257)                              | Hypothetical protein/Hypothetical protein                                |
| GL638189 | 143,611 | T→C, Intergenic (+137/-49)                               | CobB/CobQ-like protein/Hypothetical<br>protein                           |
| GL638189 | 148,941 | ΔA, Frame shift:<br>coding(642/993 nt) (A)8→7            | Sensor protein, VraS                                                     |
| GL638189 | 149,545 | D88D (GAT→GAC)                                           | Response regulator protein, VraR                                         |
| GL638189 | 150,795 | G150G (GGT→GGC)                                          | YihY family protein                                                      |
| GL638191 | 77,895  | Y166H (TAT→CAT)                                          | NAD dependent epimerase/dehydratase<br>family protein                    |
| GL638195 | 9,096   | S198P (TCC→CCC)                                          | Iron chelate uptake ABC transporter,<br>FeCT family, permease protein    |
| GL638196 | 37,902  | H120R (CAT→CGT)                                          | Orn/Lys/Arg decarboxylase, major<br>domain protein                       |

| GL638197                       | 70,754                 | <b>N3N</b> (AAC→AAT)                          | Hypothetical protein                                                                          |
|--------------------------------|------------------------|-----------------------------------------------|-----------------------------------------------------------------------------------------------|
| GL638197                       | 107,409                | +A, Frame shift:<br>coding(97/1134 nt) (A)6→7 | Low temperature requirement protein, LtrA                                                     |
| GL638197                       | 136,737                | <b>L235L</b> (TTA→CTA)                        | Oxidoreductase, FAD/FMN-binding protein                                                       |
| GL638198                       | 51,173                 | +A, Intergenic (-206/+89)<br>(A)7→8           | ABC transporter, substrate-binding protein/addiction module toxin, Txe/YoeB family            |
| GL638198                       | 88,914                 | ΔA, Frame shift:<br>coding(40/1830 nt) (T)8→7 | Amino acid permease                                                                           |
| GL638198                       | 274,232                | <b>W162*</b> (TGG→TAG) C→T                    | MBL fold hydrolase                                                                            |
| GL638198                       | 276,599                | +A, Frame shift:<br>coding(4/1623 nt) (T)6→7  | Transporter, betaine/carnitine/choline family                                                 |
| GL638198                       | 294,575                | +A, Intergenic (-82/+34)<br>(A)7→8            | Putative esterase/LPXTG-motif cell wall anchor domain protein                                 |
| <b><i>E. faecalis</i> S613</b> |                        |                                               |                                                                                               |
| Clone                          | Chromosomal Position   | Mutation                                      | Description                                                                                   |
| <b>A2-1</b>                    | 15,077                 | <b>W11*</b> (TGG→TAG)                         | Adenylosuccinate synthetase                                                                   |
|                                | 602,198                | <b>G141V</b> (GGA→GTA)                        | Hypothetical protein                                                                          |
|                                | 1,680,221              | <b>G126G</b> (GGA→GGC)                        | Substrate-specific component QueT of predicted queuosine-regulated ECF transporter            |
|                                | 2,001,928              | <b>L268*</b> (TTA→TAA)                        | Phage minor structural protein                                                                |
|                                | 2,268,468              | ΔA, Frame shift:<br>coding(582/1728 nt)       | ABC-type multidrug/protein/lipid transport system, ATPase component                           |
|                                | 2,280,609              | <b>V305D</b> (GTT→GAT)                        | ATP synthase beta chain                                                                       |
|                                | 2,390,144              | <b>D317A</b> (GAC→GCC)                        | Tellurite resistance protein                                                                  |
|                                | 2,418,233              | <b>R175H</b> (CGC→CAC)                        | Unknown protein with CBS domain                                                               |
|                                | 2,506,878              | <b>A45V</b> (GCA→GTA)                         | Transcriptional regulator of fatty acid biosynthesis, FabT                                    |
| 2,556,951                      | <b>T110R</b> (ACA→AGA) | Carbonic anhydrase, family 3                  |                                                                                               |
| <b>A3-1</b>                    | 195,824                | <b>D40A</b> (GAT→GCT)                         | Transcriptional repressor for NAD biosynthesis in gram-positives                              |
|                                | 2,280,609              | <b>V305D</b> (GTT→GAT)                        | ATP synthase beta chain                                                                       |
|                                | 2,506,878              | <b>A45V</b> (GCA→GTA)                         | Transcriptional regulator of fatty acid biosynthesis, FabT                                    |
| <b>C3-4</b>                    | 474,856                | T→A, Intergenic                               | Tyrosyl-tRNA synthetase (EC 6.1.1.1)/Decarboxylase, putative                                  |
|                                | 1,934,327              | <b>P519A</b> (CCA→GCA)                        | Duplicated ATPase component MtsB of energizing module of methionine-regulated ECF transporter |
|                                | 2,285,730              | <b>G188*</b> (GGA→TGA)                        | ATP synthase F0 sector subunit a                                                              |
|                                | 2,318,363              | C→A, Intergenic                               | SNARE-like domain protein/6-phospho-3-hexuloisomerase                                         |
|                                | 2,506,892              | <b>M40I</b> (ATG→ATT)                         | Transcriptional regulator of fatty acid biosynthesis, FabT                                    |
|                                | 2,555,387              | <b>G70G</b> (GGG→GGA)                         | Phosphoglycolate phosphatase                                                                  |
| <b>H2-4</b>                    | 105,681                | <b>G192E</b> (GGA→GAA)                        | YheO-like protein, likely involved in signaling                                               |



|      |           |                                             |                                                                                                                                                    |
|------|-----------|---------------------------------------------|----------------------------------------------------------------------------------------------------------------------------------------------------|
|      | 474,843   | +IS204, intergenic                          | Insertion of transposase IS204                                                                                                                     |
|      | 1,059,412 | T96A (ACC→GCC)                              | Transcriptional repressor of the fructose operon, DeoR family                                                                                      |
|      | 1,142,062 | R472Q (CGG→CAG)                             | Hypothetical protein with DNA binding domain and PAS domain. Likely a sugar sensor that regulates sugar usage                                      |
|      | 2,285,481 | G15C (GGT→TGT)                              | ATP synthase F0 sector subunit c                                                                                                                   |
| H3-2 | 251,022   | T397M (ACG→ATG)                             | Potassium uptake protein, integral membrane component, KtrB                                                                                        |
|      | 718,140   | +A, Intergenic                              | Osmotically activated L-carnitine/choline ABC transporter, ATP-binding protein OpuCA/hypothetical protein with no matches                          |
|      | 741,257   | Q282* (CAG→TAG)                             | Hypothetical protein that may contain family 8 glycosyl hydrolase                                                                                  |
|      | 2,282,893 | F395C (TIT→TGT)                             | ATP synthase alpha chain (EC 3.6.3.14)                                                                                                             |
| H3-3 | 251,022   | T397M (ACG→ATG)                             | Potassium uptake protein, integral membrane component, KtrB                                                                                        |
|      | 1,145,169 | C→T, Intergenic                             | Cell envelope-associated transcriptional attenuator LytR-CpsA-Psr, subfamily F2 (as in PMID19099556)/Acetolactate synthase, catabolic (EC 2.2.1.6) |
|      | 1,254,962 | P469Q (CCA→CAA)                             | ABC transporter permease protein                                                                                                                   |
|      | 1,462,227 | S121Y (TCT→TAT)                             | Hypothetical protein with a lysine motif that binds with peptidoglycan layer                                                                       |
|      | 1,478,642 | I305I (ATC→ATT)                             | Chorismate synthase                                                                                                                                |
|      | 2,278,725 | ΔT, Frame shift: coding(428/1302 nt) (T)7→6 | UDP-N-acetylglucosamine 1-carboxyvinyltransferase                                                                                                  |
|      | 2,282,893 | F395C (TIT→TGT)                             | ATP synthase alpha chain                                                                                                                           |
